# Supplementary material for: Measures of Utility Among Studies of Genomic Medicine for Critically Ill Infants: A Systematic Review
Source: PubMed Central journal article supplement (PMC9366540; doi:10.1001/jamanetworkopen.2022.25980), 2022-08-10
Supplement: jamanetwopen-e2225980-s001.pdf [file jamanetwopen-e2225980-s001.pdf]

## Supplementary Online Content

Callahan KP, Mueller R, Flibotte J, Largent EA, Feudtner C. Measures of utility among studies of genomic medicine for critically ill infants: a systematic review. *JAMA Netw Open*. 2022;5(8):e2225980. doi:10.1001/jamanetworkopen.2022.25980

**eTable.** Included Studies and Extracted Results

**eFigure.** Association Between Sample Size and Utility

**eReferences**

This supplementary material has been provided by the authors to give readers additional information about their work.

## Supplemental Material

### eTable. Included Studies and Extracted Results

Counts represent number of reported patient cases that align with each category of utility.

| First Author                  | Year | Setting                          | Inclusion Criteria                                                 | Patients Tested | Patients with Positive Results | Result had Utility | Result Changed Treatment | Result Led to Screening/ Subspecialty Referral | Results Informed Reproductive Counseling | Results informed Prognosis | Results Led to Redirection of Care |
|-------------------------------|------|----------------------------------|--------------------------------------------------------------------|-----------------|--------------------------------|--------------------|--------------------------|------------------------------------------------|------------------------------------------|----------------------------|------------------------------------|
| Daoud <sup>1</sup>            | 2016 | NICU                             | Genetics consult                                                   | 20              | 8                              | 8                  | 2                        | .                                              | 2                                        | 2                          | 2                                  |
| Stark <sup>2</sup>            | 2016 | NICU, PICU, other inpatient unit | Suspected known monogenic disorder                                 | 80              | 46                             | 15                 | 8                        | 10                                             | 28                                       | .                          | .                                  |
| Bourchany <sup>3</sup>        | 2017 | NICU, PICU, prenatal clinic      | Suspected genetic etiology                                         | 14              | 6                              | 6                  | 0                        | 0                                              | 6                                        | 2                          | .                                  |
| Van Diemen <sup>4</sup>       | 2017 | NICU, PICU                       | Specified symptom patterns                                         | 23              | 7                              | 5                  | .                        | .                                              | 2                                        | .                          | 5                                  |
| Mestek-Boukhibar <sup>5</sup> | 2018 | NICU, PICU                       | Suspected genetic etiology, diagnosis expected to alter management | 18              | 8                              | 8                  | 2                        | .                                              | 8                                        | 8                          | 0                                  |
| Petrikin <sup>6</sup>         | 2018 | NICU, PICU                       | Suspected genetic etiology or unusual therapy response             | 37              | 12                             | 11                 | 4                        | 7                                              | 9                                        | .                          | .                                  |

|                             |      |            |                                                        |     |    |    |    |    |    |    |    |
|-----------------------------|------|------------|--------------------------------------------------------|-----|----|----|----|----|----|----|----|
| <b>Elliott<sup>7</sup></b>  | 2019 | NICU       | Specified symptom patterns                             | 25  | 15 | 13 | 2  | 7  | 1  | 3  | 2  |
| <b>French<sup>8</sup></b>   | 2019 | NICU, PICU | Suspected monogenic etiology                           | 128 | 19 | 17 | 1  | 13 | 5  | .  | 3  |
| <b>Sanford<sup>9</sup></b>  | 2019 | NICU, PICU | Suspected monogenic etiology                           | 7   | 4  | 4  | 1  | 0  | .  | .  | 3  |
| <b>Wu<sup>10</sup></b>      | 2019 | NICU, PICU | Suspected genetic etiology                             | 28  | 14 | 14 | 9  | .  | 3  | 3  | 2  |
| <b>Freed<sup>12</sup></b>   | 2020 | NICU, PICU | Suspected genetic etiology per committee review*       | 43  | 21 | 17 | 13 | 8  | .  | 2  | 3  |
| <b>Smigiel<sup>11</sup></b> | 2020 | NICU, PICU | Specified symptom patterns                             | 18  | 13 | 11 | 1  | 2  | 13 | 0  | 8  |
| <b>Wang<sup>13</sup></b>    | 2020 | NICU, PICU | Suspected genetic etiology per geneticist review       | 33  | 23 | 10 | 10 | .  | .  | .  | 9  |
| <b>Gubbels<sup>14</sup></b> | 2020 | NICU       | Specified symptom patterns                             | 50  | 29 | 24 | 7  | 20 | 17 | 3  | 6  |
| <b>AGHAACF<sup>15</sup></b> | 2020 | NICU, PICU | Genetics consult                                       | 91  | 49 | 35 | 1  | 14 | .  | .  | 14 |
| <b>Dimmock<sup>15</sup></b> | 2020 | NICU, PICU | Suspected genetic etiology or unusual therapy response | 201 | 45 | 42 | 21 | 14 | 34 | 84 | 2  |

|                                |      |                                |                                                          |     |     |    |    |    |    |   |   |
|--------------------------------|------|--------------------------------|----------------------------------------------------------|-----|-----|----|----|----|----|---|---|
| <b>Wu<sup>17</sup></b>         | 2021 | NICU,<br>PICU                  | Suspected<br>genetic<br>etiology                         | 202 | 74  | 38 | 13 | 24 | .  | . | 7 |
| <b>Dimmock<sup>18</sup></b>    | 2021 | NICU,<br>PICU                  | Unknown<br>etiology or<br>unusual<br>therapy<br>response | 184 | 74  | 58 | 56 | .  | .  | . | . |
| <b>Krantz<sup>19</sup></b>     | 2021 | NICU,<br>PICU                  | Suspected<br>genetic<br>disease                          | 354 | 111 | 83 | 24 | 39 | .  | . | 4 |
| <b>Scholz<sup>20</sup></b>     | 2021 | NICU,<br>PICU                  | Unknown<br>etiology                                      | 61  | 28  | 28 | 8  | 11 | 28 | 3 | . |
| <b>Kamolvisit<sup>21</sup></b> | 2021 | NICU,<br>PICU,<br>adult<br>ICU | Unknown<br>etiology                                      | 37  | 20  | 19 | 8  | .  | .  | . | . |

**eFigure. Association Between Sample Size and Utility**

Each point represents a study and the fitted line represents a fractional polynomial model.

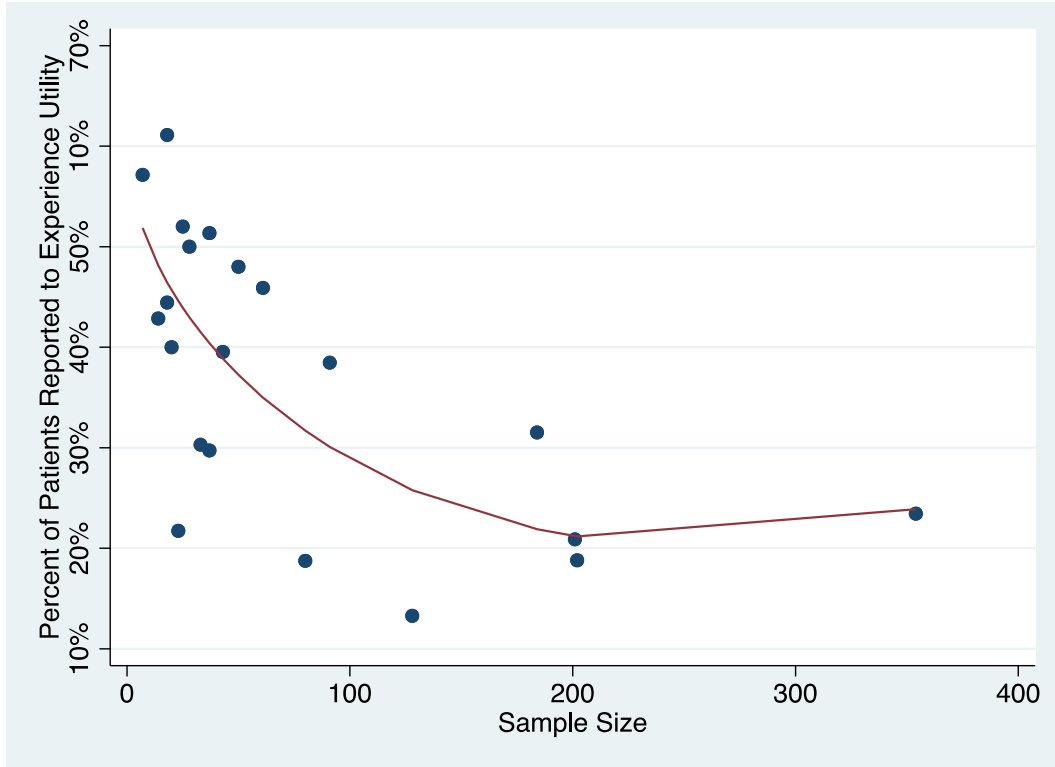

## eReferences

1. Daoud H, Luco SM, Li R, et al. Next-generation sequencing for diagnosis of rare diseases in the neonatal intensive care unit. *CMAJ*. 2016;188(11):E254-E260. doi:10.1503/cmaj.150823
2. Stark Z, Tan TY, Chong B, et al. A prospective evaluation of whole-exome sequencing as a first-tier molecular test in infants with suspected monogenic disorders. *Genet Med*. 2016;18(11):1090-1096. doi:10.1038/gim.2016.1
3. Bourchany A, Thauvin-Robinet C, Lehalle D, et al. Reducing diagnostic turnaround times of exome sequencing for families requiring timely diagnoses. *Eur J Med Genet*. 2017;60(11):595-604. doi:10.1016/j.ejmg.2017.08.011
4. van Diemen CC, Kerstjens-Frederikse WS, Bergman KA, et al. Rapid Targeted Genomics in Critically Ill Newborns. *Pediatrics*. 2017;140(4). doi:10.1542/peds.2016-2854
5. Mestek-Boukhibar L, Clement E, Jones WD, et al. Rapid Paediatric Sequencing (RaPS): comprehensive real-life workflow for rapid diagnosis of critically ill children. *J Med Genet*. 2018;55(11):721-728. doi:10.1136/jmedgenet-2018-105396
6. Petrikin JE, Cakici JA, Clark MM, et al. The NSIGHT1-randomized controlled trial: rapid whole-genome sequencing for accelerated etiologic diagnosis in critically ill infants. *npj Genomic Medicine*. 2018;3(1):1-11. doi:10.1038/s41525-018-0045-8
7. Elliott AM, du Souich C, Lehman A, et al. RAPIDOMICS: rapid genome-wide sequencing in a neonatal intensive care unit-successes and challenges. *Eur J Pediatr*. 2019;178(8):1207-1218. doi:10.1007/s00431-019-03399-4
8. French CE, Delon I, Dolling H, et al. Whole genome sequencing reveals that genetic conditions are frequent in intensively ill children. *Intensive Care Med*. 2019;45(5):627-636. doi:10.1007/s00134-019-05552-x
9. Sanford EF, Clark MM, Farnaes L, et al. Rapid whole genome sequencing has clinical utility in children in the pediatric intensive care unit. *Pediatr Crit Care Med*. 2019;20(11):1007-1020. doi:10.1097/PCC.0000000000002056
10. Wu ET, Hwu WL, Chien YH, et al. Critical Trio Exome Benefits In-Time Decision-Making for Pediatric Patients With Severe Illnesses. *Pediatr Crit Care Med*. 2019;20(11):1021-1026. doi:10.1097/PCC.0000000000002068
11. Smigiel R, Biela M, Szmyd K, et al. High impact of mitochondrial disorders in the critically ill infants hospitalized in the intensive care units diagnosed by RAPID WES. *J Inherit Metab Dis*. 2019;42((Smigiel R.; Biela M.; Bloch M.) Dep Paediatric and Rare Dis, Med Univ, Wroclaw, Poland):211. doi:10.1002/jimd.12153
12. Freed AS, Clowes Candadai SV, Sikes MC, et al. The Impact of Rapid Exome Sequencing on Medical Management of Critically Ill Children. *The Journal of Pediatrics*. 2020;226:202-212.e1. doi:10.1016/j.jpeds.2020.06.020
13. Wang H, Qian Y, Lu Y, et al. Clinical utility of 24-h rapid trio-exome sequencing for critically ill infants. *npj Genom Med*. 2020;5(1). doi:10.1038/s41525-020-0129-0
14. Gubbels CS, VanNoy GE, Madden JA, et al. Prospective, phenotype-driven selection of critically ill neonates for rapid exome sequencing is associated with high diagnostic yield. *Genetics in Medicine*. 2020;22(4):736-744. doi:10.1038/s41436-019-0708-6

15. Australian Genomics Health Alliance Acute Care Flagship, Lunke S, Eggers S, et al. Feasibility of Ultra-Rapid Exome Sequencing in Critically Ill Infants and Children With Suspected Monogenic Conditions in the Australian Public Health Care System. *JAMA*. 2020;323(24):2503-2511. doi:10.1001/jama.2020.7671
16. Dimmock DP, Clark MM, Gaughran M, et al. An RCT of Rapid Genomic Sequencing among Seriously Ill Infants Results in High Clinical Utility, Changes in Management, and Low Perceived Harm. *Am J Hum Genet*. 2020;107(5):942-952. doi:10.1016/j.ajhg.2020.10.003
17. Wu B, Kang W, Wang Y, et al. Application of Full-Spectrum Rapid Clinical Genome Sequencing Improves Diagnostic Rate and Clinical Outcomes in Critically Ill Infants in the China Neonatal Genomes Project. *Crit Care Med*. Published online 2021:1674-1683. doi:10.1097/CCM.0000000000005052
18. Dimmock D, Caylor S, Waldman B, et al. Project Baby Bear: Rapid precision care incorporating rWGS in 5 California children's hospitals demonstrates improved clinical outcomes and reduced costs of care. *Am J Hum Genet*. 2021;108(7):1231-1238. doi:10.1016/j.ajhg.2021.05.008
19. Krantz ID, Medne L, Weatherly JM, et al. Effect of Whole-Genome Sequencing on the Clinical Management of Acutely Ill Infants with Suspected Genetic Disease: A Randomized Clinical Trial. *JAMA Pediatr*. Published online 2021. doi:10.1001/jamapediatrics.2021.3496
20. Scholz T, Blohm ME, Kortüm F, et al. Whole-Exome Sequencing in Critically Ill Neonates and Infants: Diagnostic Yield and Predictability of Monogenic Diagnosis. *NEO*. 2021;118(4):454-461. doi:10.1159/000516890
21. Kamolvisit W, Phowthongkum P, Boonsimma P, et al. Rapid exome sequencing as the first-tier investigation for diagnosis of acutely and severely ill children and adults in Thailand. *Clin Genet*. 2021;100(1):100-105. doi:10.1111/cge.13963
